# Supplementary material
Source: Springer Nature journal article supplement (https://www.springermedizin.de/resource/supplementary/12885_2012_3552_MOESM2_ESM.pdf/9463602)

**A**

Ctr

si-Slug

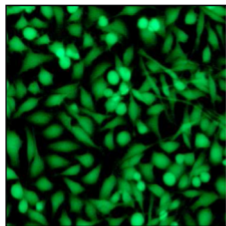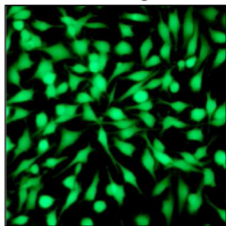**B**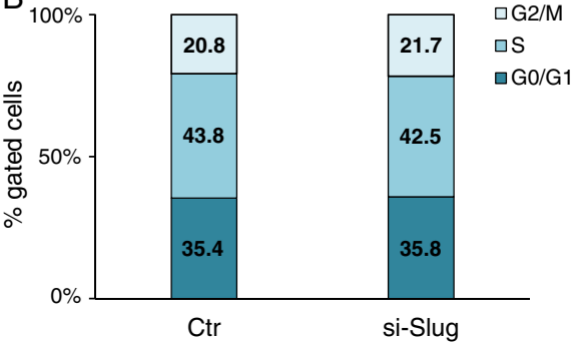

Supplement: MOESM2 [file 9463602]
